# Supplementary material for: The roles of different Bacteroides fragilis strains in protecting against DSS-induced ulcerative colitis and related functional genes
Source: Royal Society of Chemistry journal article supplement (doi:10.1039/d1fo00875g), 2021-01-01
Supplement: d1fo00875g1.pdf [file d1fo00875g1.pdf]

**Table S1. Information of the CAZY\_family enriched in *B. fragilis* NCTC9343 and FSHCM14E1 genomes**

| CAZY_famil<br>y | Number of genes associated with CAZY<br>functional categories in three strains |      |      | Family_known-activities                                                                                                                                                                                                                                                                                                                                                                                                                                                                                                                                                                                                                                                                                                                                                                                             |
|-----------------|--------------------------------------------------------------------------------|------|------|---------------------------------------------------------------------------------------------------------------------------------------------------------------------------------------------------------------------------------------------------------------------------------------------------------------------------------------------------------------------------------------------------------------------------------------------------------------------------------------------------------------------------------------------------------------------------------------------------------------------------------------------------------------------------------------------------------------------------------------------------------------------------------------------------------------------|
|                 | NCTC9343                                                                       | 14E1 | 11BF |                                                                                                                                                                                                                                                                                                                                                                                                                                                                                                                                                                                                                                                                                                                                                                                                                     |
| CBM16           | 5                                                                              | 23   | 2    | Binding to cellulose and glucomannan                                                                                                                                                                                                                                                                                                                                                                                                                                                                                                                                                                                                                                                                                                                                                                                |
| CBM32           | 119                                                                            | 125  | 108  | Binding to galactose and lactose; Binding to polygalacturonic acid; Binding to LacNAc ( $\beta$ -D-galactosyl-1,4- $\beta$ -D-N-acetylglucosamine)                                                                                                                                                                                                                                                                                                                                                                                                                                                                                                                                                                                                                                                                  |
| CBM35           | 28                                                                             | 28   | 22   | A module in a <i>Phanerochaete chrysosporium</i> galactan 1,3- $\beta$ -galactosidase binds to $\beta$ -galactan.                                                                                                                                                                                                                                                                                                                                                                                                                                                                                                                                                                                                                                                                                                   |
| CBM48           | 13                                                                             | 13   | 11   | glycogen-binding function                                                                                                                                                                                                                                                                                                                                                                                                                                                                                                                                                                                                                                                                                                                                                                                           |
| CBM50           | 394                                                                            | 386  | 364  | Binding to chitopentaose.                                                                                                                                                                                                                                                                                                                                                                                                                                                                                                                                                                                                                                                                                                                                                                                           |
| GH10            | 19                                                                             | 17   | 16   | endo-1,4- $\beta$ -xylanase; endo-1,3- $\beta$ -xylanase; tomatinase ; xylan endotransglycosylase; endo- $\beta$ -1,4-glucanase                                                                                                                                                                                                                                                                                                                                                                                                                                                                                                                                                                                                                                                                                     |
| GH20            | 240                                                                            | 239  | 228  | $\beta$ -hexosaminidase; lacto-N-biosidase; $\beta$ -1,6-N-acetylglucosaminidase; $\beta$ -6-SO <sub>3</sub> -N-acetylglucosaminidase                                                                                                                                                                                                                                                                                                                                                                                                                                                                                                                                                                                                                                                                               |
| GH65            | 68                                                                             | 73   | 54   | $\alpha,\alpha$ -trehalase; maltose phosphorylase; trehalose phosphorylase; kojibiose phosphorylase; trehalose-6-phosphate phosphorylase; nigerose phosphorylase; 3-O- $\alpha$ -glucopyranosyl-L-rhamnose phosphorylase; 2-O- $\alpha$ -glucopyranosylglycerol: phosphate $\beta$ -glucosyltransferase; $\alpha$ -glucosyl-1,2- $\beta$ -galactosyl-L-hydroxylysine $\alpha$ -glucosidase; 1,3- $\beta$ -oligoglucan phosphorylase                                                                                                                                                                                                                                                                                                                                                                                 |
| GT2             | 1301                                                                           | 1323 | 1242 | cellulose synthase; chitin synthase; dolichyl-phosphate $\beta$ -D-mannosyltransferase; dolichyl-phosphate $\beta$ -glucosyltransferase; N-acetylglucosaminyltransferase; N-acetylgalactosaminyltransferase; hyaluronan synthase; chitin oligosaccharide synthase; $\beta$ -1,3-glucan synthase; $\beta$ -1,4-mannan synthase; $\beta$ -mannosylphosphodecaprenol-mannooligosaccharide $\alpha$ -1,6-mannosyltransferase; UDP-Galf: rhamnopyranosyl-N-acetylglucosaminyl-PP-decaprenol $\beta$ -1,4/1,5-galactofuranosyltransferase; UDP-Galf: galactofuranosyl-galactofuranosyl-rhamnosyl-N-acetylglucosaminyl-PP-decaprenol $\beta$ -1,5/1,6-galactofuranosyltransferase; dTDP-L-Rha: N-acetylglucosaminyl-PP-decaprenol $\alpha$ -1,3-L-rhamnosyltransferase; alternating $\beta$ -1,3/4-N-acetylmannan synthase |

Note: CBM, Carbohydrate-Binding Module; GH, Glycoside Hydrolase; GT, GlycosylTransferase.
